# Supplementary material for: A Structural Domain Mediates Attachment of Ethanolamine Phosphoglycerol to Eukaryotic Elongation Factor 1A in Trypanosoma brucei
Source: PLoS One. 2010 Mar 2;5(3):e9486. doi: 10.1371/journal.pone.0009486 (PMC2830473; doi:10.1371/journal.pone.0009486)
Supplement: Table S1 — (0.05 MB DOC) [file pone.0009486.s001.doc]

Table S1: Plasmids used for transfection of *T. brucei* procyclin#1

| Point mutants | Deletion mutants | Fusion mutants |
| --- | --- | --- |
| pEGhaEF(E362Q) | pEGhaEF(1-449) | pBS(315-449) |
| pEGhaEF(E362A) | pEGhaEF(1-243/315-449) | pEGhaAlba(315-449) |
| pEGhaEF(E362D) | pEGhaEF(315-449) | pEGptp(315-449) |
| pEGhaEF(F360T) | pEGhaEF(348-449) |  |
| pEGhaEF(A361D) | pEGhaEF(315-394) |  |
| pEGhaEF(I363L) |  |  |
| pEGhaEF(E364L) |  |  |
| pEGhaEF(S365E) |  |  |
| pEGhaEF(K366S) |  |  |
